# Supplementary material for: A Global and Spatially Explicit Assessment of Climate Change Impacts on Crop Production and Consumptive Water Use
Source: PubMed Central journal article supplement (PMC3583897; doi:10.1371/journal.pone.0057750), 2013-02-27
Supplement: pone.0057750.s001.pdf [file pone.0057750.s001.pdf]

**Table S1. Ranges and confidence levels of the impacts of climate change on aggregated production index (API), aggregated consumptive water use index (AWI), and aggregated irrigation water proportion index (AIWI)**

Note:

- (1) A positive percentage (e.g. +7.2%) shows that climate change will lead to an increase of the output variable (by 7.2%), while a negative percentage (e.g. -19.8%) shows that climate change will lead to a decrease of the output variable (by 19.8%);
- (2) The subscripts of 30 and 90 indicates the periods of the 2030s and 2090s, respectively;
- (3)  $\Delta API_{30}$  indicates the relative change of API (in percentage) in the 2030s compared to the 1990s;
- (4) The colors indicate different confidence levels of the impacts of climate change as follows:

|  |                                                   |
|--|---------------------------------------------------|
|  | Increase with high confidence                     |
|  | Increase with medium confidence                   |
|  | Increase with low confidence                      |
|  | Increase/decrease mixed                           |
|  | Decrease with low confidence                      |
|  | Decrease with medium confidence                   |
|  | Decrease with high confidence                     |
|  | Countries where no irrigation is applied (AIWI=0) |

| Country Name            | Continent | $\Delta API_{30}$ | $\Delta API_{90}$ | $\Delta AWI_{30}$ | $\Delta AWI_{90}$ | $\Delta AIWI_{30}$ | $\Delta AIWI_{90}$ |
|-------------------------|-----------|-------------------|-------------------|-------------------|-------------------|--------------------|--------------------|
| Algeria                 | Africa    | -19.8% - 7.2%     | -16.0% - 23.2%    | -14.5% - 0.5%     | -26.8% - 1.4%     | -7.2% - 84.6%      | -18.1% - 81.4%     |
| Angola                  | Africa    | -6.0% - 5.8%      | -5.1% - 11.2%     | -1.2% - 9.8%      | 1.3% - 26.5%      | -16.1% - 14.4%     | -44.0% - 4.2%      |
| Benin                   | Africa    | -2.1% - 2.3%      | -16.9% - -2.5%    | -3.3% - 20.7%     | -10.4% - 23.8%    | -32.7% - 0.3%      | -77.9% - 81.8%     |
| Botswana                | Africa    | -2.8% - 11.4%     | -29.5% - 6.2%     | -10.5% - 4.7%     | -32.9% - -8.8%    | 5.2% - 19.7%       | -41.9% - 56.6%     |
| Burkina Faso            | Africa    | -0.1% - 5.8%      | -19.0% - -4.6%    | -6.4% - 12.1%     | -12.7% - 14.4%    | -21.9% - 105.7%    | -51.0% - 114.6%    |
| Burundi                 | Africa    | 0.7% - 4.5%       | -9.2% - 4.5%      | -3.7% - 6.1%      | -13.2% - 5.9%     | -17.7% - 20.0%     | -45.2% - 34.7%     |
| Cameroon                | Africa    | 1.6% - 5.8%       | -16.1% - 0.0%     | -4.1% - 20.5%     | -12.5% - 22.3%    | 22.3% - 225.6%     | -17.5% - 238.4%    |
| Central Africa Republic | Africa    | -6.0% - 1.1%      | -30.1% - -3.2%    | -1.5% - 18.5%     | -8.9% - 16.6%     | -15.9% - 338.9%    | 30.2% - 2396.0%    |
| Chad                    | Africa    | -6.4% - 0.7%      | -21.5% - -0.8%    | -6.3% - 5.6%      | -14.4% - 8.2%     | -5.0% - 32.9%      | -36.6% - 23.6%     |
| Comoros                 | Africa    | -0.8% - 8.7%      | -9.6% - 5.6%      | -14.5% - 18.2%    | -31.7% - 27.9%    | 0.0% - 0.0%        | 0.0% - 0.0%        |

|                   |        |              |               |               |               |                |                |
|-------------------|--------|--------------|---------------|---------------|---------------|----------------|----------------|
| Congo             | Africa | -5.9% -0.0%  | -21.5% --4.0% | -8.2% -13.3%  | -16.4% -16.8% | 0.0% -0.0%     | 0.0% -0.0%     |
| Egypt             | Africa | -6.9% -4.4%  | -46.6% --1.3% | -4.8% -18.1%  | -18.6% -18.6% | -0.6% -1.8%    | -3.9% -18.9%   |
| Equatorial Guinea | Africa | -5.2% --2.3% | -14.9% --5.2% | -8.4% -24.3%  | -22.0% -35.3% | 0.0% -0.0%     | 0.0% -0.0%     |
| Eritrea           | Africa | -9.9% -1.3%  | -15.0% -15.9% | -5.5% -1.9%   | -21.3% -13.7% | -26.4% -22.3%  | -86.1% -2.2%   |
| Ethiopia          | Africa | -1.6% -1.5%  | -17.5% -0.3%  | -10.0% -9.4%  | -29.8% -6.3%  | -7.7% -52.8%   | -41.8% -112.8% |
| Gabon             | Africa | -6.5% --0.6% | -13.9% --4.3% | -14.0% -20.3% | -19.1% -26.9% | -41.7% -62.4%  | -29.2% -171.0% |
| Gambia            | Africa | -6.1% --0.4% | -35.3% --3.8% | -8.0% -5.8%   | -12.3% -9.2%  | -32.2% -5.9%   | -60.0% -69.8%  |
| Ghana             | Africa | 0.8% -2.9%   | -15.7% --4.1% | -3.9% -18.7%  | -11.9% -21.8% | -0.9% -136.4%  | -33.2% -803.4% |
| Guinea            | Africa | -0.8% -1.9%  | -18.0% -1.0%  | -7.1% -20.9%  | -15.0% -26.8% | -33.8% -179.7% | -46.4% -193.9% |
| Guinea-Bissau     | Africa | -0.7% -4.1%  | -25.6% -3.5%  | -8.2% -25.6%  | -16.2% -30.8% | -33.8% -65.2%  | -6.7% -197.4%  |
| Ivory Coast       | Africa | 0.0% -4.0%   | -16.1% --1.3% | -4.3% -14.2%  | -12.5% -17.0% | -32.9% -222.9% | -47.5% -418.3% |
| Kenya             | Africa | -1.0% -6.3%  | -11.3% -3.9%  | -0.1% -8.7%   | -7.4% -7.2%   | -20.2% -17.6%  | -44.8% -16.0%  |
| Lesotho           | Africa | 24.5% -30.6% | 20.1% -47.5%  | 6.8% -12.9%   | -3.9% -24.8%  | -22.2% -29.9%  | -67.0% -125.1% |
| Liberia           | Africa | -0.5% -3.7%  | -19.9% --5.7% | -4.1% -18.4%  | -14.3% -24.7% | 10.6% -1299.6% | 96.4% -1127.8% |
| Libya             | Africa | -26.1% -6.7% | -22.9% -13.2% | -6.5% --0.6%  | -19.3% --1.0% | -14.1% -42.8%  | -12.2% -45.1%  |
| Madagascar        | Africa | -0.1% -10.4% | 5.7% -17.7%   | -6.2% -21.6%  | -5.4% -30.7%  | -26.1% -3.3%   | -7.5% -28.9%   |
| Malawi            | Africa | 1.5% -16.1%  | -4.8% -16.6%  | 3.5% -19.4%   | -0.7% -19.4%  | -35.8% --10.9% | -77.9% --18.1% |
| Mali              | Africa | -3.7% -3.4%  | -27.1% --0.3% | -7.4% -10.9%  | -15.0% -17.0% | -13.8% -19.2%  | -51.9% -16.8%  |
| Mauritania        | Africa | -11.0% -4.4% | -44.8% -2.2%  | -9.9% -2.5%   | -19.0% -7.9%  | 0.5% -16.7%    | -13.8% -34.8%  |
| Morocco           | Africa | -18.2% -8.3% | -19.0% -11.1% | -5.3% --0.5%  | -16.1% -2.6%  | -8.7% -65.2%   | -23.5% -52.3%  |
| Mozambique        | Africa | -5.2% -8.9%  | -15.0% -8.0%  | -5.7% -17.7%  | -11.0% -8.8%  | -19.3% -15.8%  | -63.8% -12.0%  |
| Namibia           | Africa | -4.4% -18.3% | -47.8% -36.5% | -12.6% -27.3% | -41.9% -42.8% | -10.4% -11.7%  | -95.0% -27.9%  |
| Niger             | Africa | -9.5% --3.2% | -14.4% --6.8% | -10.9% -0.0%  | -16.1% -2.2%  | 11.6% -65.5%   | -20.9% -54.5%  |
| Nigeria           | Africa | -1.5% -3.4%  | -17.3% --3.3% | -4.5% -13.7%  | -10.5% -14.3% | 5.7% -100.7%   | -54.4% -105.3% |
| Rwanda            | Africa | -2.1% -4.5%  | -8.4% -7.0%   | -4.4% -3.6%   | -13.0% -5.5%  | -26.4% -19.6%  | -51.9% -196.7% |
| Senegal           | Africa | -4.1% -0.9%  | -30.4% --4.5% | -6.9% -12.5%  | -13.0% -12.2% | -5.9% -47.1%   | -20.9% -51.3%  |
| Sierra Leone      | Africa | -4.3% -0.8%  | -15.0% -4.1%  | -8.2% -33.4%  | -18.9% -45.6% | 0.3% -84.1%    | -9.3% -240.0%  |
| Somalia           | Africa | -4.8% -1.1%  | -51.7% --0.5% | -5.2% -15.1%  | -25.7% -18.9% | -3.1% -8.1%    | -4.4% -10.5%   |
| South Africa      | Africa | 6.3% -18.5%  | -20.7% -21.1% | -3.4% -8.0%   | -31.7% -5.1%  | -2.8% -25.4%   | -7.5% -80.3%   |
| Sudan             | Africa | -10.9% -2.4% | -69.5% -0.4%  | -4.7% -3.6%   | -37.8% -3.5%  | 11.9% -23.9%   | -7.3% -42.5%   |

|             |        |                |                |                |                |                 |                  |
|-------------|--------|----------------|----------------|----------------|----------------|-----------------|------------------|
| Swaziland   | Africa | -7.0% - 7.8%   | -26.8% - 10.4% | -15.1% --0.2%  | -41.6% --0.7%  | -5.4% -47.0%    | -15.4% - 58.6%   |
| Tanzania    | Africa | 1.2% - 6.9%    | -8.2% - 7.2%   | -2.2% - 14.1%  | -13.4% - 17.6% | -24.1% - 4.7%   | -55.8% - -8.9%   |
| Togo        | Africa | -2.8% - 2.2%   | -13.5% - -3.7% | -5.5% - 17.3%  | -11.2% - 21.0% | 20.9% - 226.6%  | -17.0% - 692.8%  |
| Tunisia     | Africa | -21.5% - 10.2% | -7.7% - 23.4%  | -6.3% - 0.3%   | -15.2% - -1.4% | -15.6% - 81.0%  | -32.5% - 60.0%   |
| Uganda      | Africa | 1.1% - 6.3%    | -17.4% - 0.6%  | -4.0% - 15.1%  | -16.5% - 17.4% | -17.9% - 53.1%  | -71.2% - 199.4%  |
| Zaire       | Africa | -6.9% - -0.7%  | -21.1% - -2.3% | -5.4% - 7.6%   | -9.5% - 6.8%   | -25.2% - -3.7%  | -65.5% - 2.5%    |
| Zambia      | Africa | 2.1% - 13.2%   | -3.1% - 15.4%  | 3.2% - 14.0%   | -5.3% - 27.1%  | -35.0% - -7.3%  | -76.0% - -6.2%   |
| Zimbabwe    | Africa | -9.7% - 19.7%  | -22.6% - 26.6% | -7.3% - 7.8%   | -25.9% - 3.0%  | -12.5% - 11.4%  | -45.7% - 25.8%   |
| Afghanistan | Asia   | 3.3% - 14.7%   | 9.6% - 28.8%   | -2.3% - -0.3%  | -14.2% - 2.2%  | -4.9% - 8.8%    | -32.9% - 4.5%    |
| Armenia     | Asia   | 3.0% - 11.6%   | -1.0% - 10.7%  | -5.0% - 6.6%   | -16.1% - 3.9%  | -6.8% - 14.9%   | 1.2% - 36.7%     |
| Azerbaijan  | Asia   | 0.0% - 4.5%    | 4.4% - 12.3%   | -2.7% - 5.2%   | -14.7% - 2.6%  | -12.0% - 5.5%   | -16.1% - 14.0%   |
| Bangladesh  | Asia   | -9.6% - 7.2%   | -11.3% - 13.2% | -5.6% - 29.7%  | -21.5% - 37.8% | -10.0% - 50.4%  | -28.5% - 82.7%   |
| Bhutan      | Asia   | 8.4% - 11.3%   | 13.2% - 36.5%  | -1.1% - 22.4%  | 3.8% - 39.2%   | -29.7% - 9.1%   | -35.1% - 48.0%   |
| Brunei      | Asia   | 1.9% - 9.0%    | -9.4% - 13.4%  | -3.9% - 23.0%  | -16.3% - 34.6% | -99.7% - 275.5% | -98.9% - 1269.6% |
| Cambodia    | Asia   | 1.3% - 8.2%    | -15.8% - 7.8%  | -3.5% - 27.8%  | -11.5% - 33.8% | 47.5% - 424.7%  | 145.7% - 700.4%  |
| China       | Asia   | -1.1% - 6.6%   | -19.8% - 14.0% | -2.9% - 13.9%  | -15.8% - 20.7% | -14.4% - 20.1%  | -34.1% - 27.7%   |
| Georgia     | Asia   | -2.9% - 3.2%   | -19.2% - -0.2% | -1.8% - 7.5%   | -20.7% - 2.6%  | 2.3% - 24.5%    | -14.3% - 113.8%  |
| India       | Asia   | -12.9% - 1.2%  | -33.4% - -7.5% | -13.0% - 18.4% | -28.2% - 22.3% | -16.4% - 47.7%  | -38.0% - 56.4%   |
| Indonesia   | Asia   | 0.3% - 4.4%    | -7.0% - 6.4%   | -7.5% - 16.6%  | -15.5% - 23.3% | 11.8% - 61.5%   | 4.1% - 114.2%    |
| Iran        | Asia   | -3.3% - 9.6%   | 5.5% - 26.1%   | -1.9% - 1.2%   | -12.1% - -0.5% | -4.6% - 7.8%    | -24.6% - 5.2%    |
| Iraq        | Asia   | -15.0% - 5.7%  | -27.7% - 6.1%  | -5.1% - -2.1%  | -21.0% - -3.3% | -1.9% - 19.7%   | -18.1% - 9.6%    |
| Israel      | Asia   | -33.5% - 12.3% | -38.9% - 11.1% | -11.1% - 3.9%  | -31.5% - -1.3% | -26.1% - 108.3% | -21.0% - 113.4%  |
| Japan       | Asia   | 0.3% - 11.1%   | 0.1% - 39.3%   | -2.9% - 17.3%  | -4.3% - 31.4%  | -46.5% - 14.3%  | -48.7% - 105.4%  |
| Jordan      | Asia   | -8.6% - 18.9%  | -9.6% - 20.8%  | -3.2% - 7.0%   | -17.7% - -0.3% | -21.8% - 28.4%  | -25.0% - 36.9%   |
| Kazakhstan  | Asia   | -15.2% - 13.8% | -36.5% - 89.5% | -8.3% - 6.2%   | -28.9% - 30.8% | -9.0% - 23.0%   | -72.7% - 2.5%    |
| Kuwait      | Asia   | -57.2% - 3.4%  | -60.1% - 5.1%  | -11.6% - -0.1% | -28.2% - -6.6% | 0.0% - 0.0%     | 0.0% - 0.0%      |
| Kyrgyzstan  | Asia   | 5.4% - 18.3%   | 4.8% - 39.4%   | 1.9% - 8.4%    | -9.4% - 13.6%  | -15.0% - 12.2%  | -41.7% - 9.1%    |
| Laos        | Asia   | -0.4% - 6.1%   | -10.9% - 12.7% | -3.5% - 33.0%  | -10.8% - 40.9% | -67.4% - 48.8%  | -72.0% - 88.0%   |
| Lebanon     | Asia   | -18.9% - 33.6% | -14.1% - 56.0% | 3.0% - 15.6%   | -1.0% - 8.9%   | -40.8% - 25.5%  | -43.3% - 46.2%   |
| Malaysia    | Asia   | 1.0% - 9.3%    | -9.2% - 13.4%  | -3.4% - 24.0%  | -15.1% - 32.5% | -33.0% - 81.7%  | -53.9% - 239.6%  |

|                      |        |                |                 |                |                 |                 |                 |
|----------------------|--------|----------------|-----------------|----------------|-----------------|-----------------|-----------------|
| Mongolia             | Asia   | 1.5% - 8.8%    | -11.0% - 17.7%  | -4.8% - 3.4%   | -19.9% - 10.2%  | -3.3% - 33.6%   | -70.0% - 36.3%  |
| Myanmar              | Asia   | 0.1% - 8.7%    | -10.5% - 12.0%  | -2.8% - 43.5%  | -11.1% - 45.1%  | -19.2% - 29.4%  | -52.6% - 72.8%  |
| Nepal                | Asia   | -48.9% - 0.3%  | -56.3% - -1.7%  | -50.0% - 20.4% | -58.1% - 23.1%  | -37.8% - 13.5%  | -61.1% - 45.5%  |
| North Korea          | Asia   | -2.6% - 8.5%   | -15.1% - 20.5%  | -1.2% - 17.2%  | -6.1% - 28.9%   | -25.9% - 18.0%  | -40.4% - 17.1%  |
| Oman                 | Asia   | -71.7% - 1.2%  | -76.5% - -18.3% | -12.4% - -3.0% | -32.7% - -13.2% | -4.1% - 12.0%   | -15.5% - 14.2%  |
| Pakistan             | Asia   | -21.4% - 3.7%  | -57.2% - -6.8%  | -15.6% - 6.4%  | -36.3% - 8.4%   | -11.4% - 10.8%  | -34.5% - 23.0%  |
| Philippines          | Asia   | -1.5% - 1.5%   | -8.9% - 2.3%    | -3.9% - 23.5%  | -10.8% - 28.4%  | -29.6% - 117.7% | -37.2% - 199.1% |
| Qatar                | Asia   | -11.2% - 0.3%  | -91.8% - -5.2%  | 4.6% - 27.9%   | -88.0% - 31.7%  | 0.0% - 0.0%     | 0.0% - 0.0%     |
| Saudi Arabia         | Asia   | -55.6% - 7.7%  | -59.5% - -5.5%  | -8.9% - 5.7%   | -20.1% - 0.3%   | -1.9% - 4.4%    | -3.6% - 6.4%    |
| South Korea          | Asia   | -1.4% - 23.3%  | 36.2% - 63.7%   | -1.8% - 15.0%  | -19.3% - 19.9%  | -28.1% - -6.1%  | -50.3% - -7.0%  |
| Sri Lanka            | Asia   | -7.0% - 0.6%   | -15.0% - 3.1%   | -3.6% - 27.7%  | -10.3% - 41.7%  | -15.6% - 67.5%  | -68.8% - 47.1%  |
| Syria                | Asia   | -3.3% - 15.2%  | -16.2% - 16.1%  | -1.6% - 6.0%   | -24.1% - 3.0%   | -20.0% - 10.2%  | -18.7% - 23.2%  |
| Tajikistan           | Asia   | 1.8% - 21.0%   | 11.6% - 55.6%   | -3.7% - 2.3%   | -5.1% - 1.7%    | -16.7% - 16.3%  | -56.9% - 12.7%  |
| Thailand             | Asia   | -1.4% - 7.5%   | -16.8% - 3.7%   | -3.8% - 22.9%  | -11.3% - 27.1%  | -33.1% - 46.0%  | -32.0% - 170.4% |
| Turkey               | Asia   | -4.1% - 8.8%   | -1.5% - 16.1%   | -1.6% - 2.9%   | -15.0% - 1.8%   | -4.0% - 22.8%   | -4.4% - 27.0%   |
| Turkmenistan         | Asia   | 0.6% - 18.5%   | -7.1% - 26.2%   | -2.5% - 0.0%   | -21.2% - -2.2%  | -14.1% - -1.3%  | -25.1% - 3.8%   |
| United Arab Emirates | Asia   | -47.1% - -2.1% | -57.0% - -20.1% | -7.0% - 13.1%  | -35.4% - 5.1%   | -1.0% - 26.4%   | -18.0% - 34.1%  |
| Uzbekistan           | Asia   | -3.6% - 11.7%  | 0.5% - 20.0%    | -5.4% - -2.6%  | -19.9% - -0.6%  | -12.9% - 10.0%  | -30.4% - -2.7%  |
| Vietnam              | Asia   | -1.9% - 7.0%   | -21.1% - 5.5%   | -3.4% - 29.8%  | -12.4% - 39.8%  | -31.6% - 100.7% | -6.5% - 273.9%  |
| West Bank            | Asia   | -39.2% - 30.4% | -39.6% - 37.4%  | -13.2% - 10.8% | -15.5% - 11.6%  | -39.4% - 88.1%  | -54.1% - 96.4%  |
| Yemen                | Asia   | -6.4% - 1.7%   | -41.9% - 9.2%   | -12.5% - 8.0%  | -54.6% - 19.9%  | 0.3% - 19.4%    | -42.9% - 11.0%  |
| Albania              | Europe | -6.7% - 1.8%   | -28.1% - 5.7%   | -3.9% - 3.7%   | -32.7% - 7.6%   | 11.3% - 72.0%   | -12.8% - 45.7%  |
| Austria              | Europe | -4.1% - 8.7%   | -4.4% - 25.2%   | -2.8% - 5.3%   | -16.2% - 9.8%   | 6.7% - 68.1%    | -37.8% - 148.3% |
| Belgium              | Europe | -2.3% - 7.7%   | -18.1% - 29.2%  | -6.3% - 10.6%  | -30.3% - 15.3%  | -26.4% - 64.2%  | -23.7% - 274.5% |
| Bosnia & Herzegovina | Europe | -8.1% - 3.7%   | -26.1% - 11.8%  | -4.6% - 4.2%   | -25.7% - 3.1%   | 8.2% - 34.0%    | 0.0% - 85.2%    |
| Bulgaria             | Europe | -13.8% - -1.1% | -13.5% - 0.3%   | -9.0% - -0.7%  | -21.0% - -2.8%  | 13.4% - 51.6%   | -16.4% - 44.5%  |
| Byelarus             | Europe | 10.8% - 23.8%  | 2.4% - 39.4%    | 6.7% - 21.8%   | -10.0% - 27.3%  | -35.1% - 31.7%  | -79.6% - 161.1% |
| Croatia              | Europe | -12.3% - 1.6%  | -32.1% - 3.4%   | -11.6% - 0.9%  | -29.1% - -1.1%  | 6.0% - 52.1%    | -61.3% - 114.4% |
| Cyprus               | Europe | -13.7% - -4.5% | -13.3% - 4.3%   | -3.8% - 18.8%  | -17.4% - 20.8%  | -13.9% - 1.7%   | -21.2% - -0.2%  |
| Czech Republic       | Europe | 0.0% - 11.0%   | 3.3% - 23.9%    | 1.9% - 10.0%   | -6.7% - 11.6%   | -37.7% - 19.0%  | -48.5% - 100.0% |

|                |            |                |                |                |                |                 |                 |
|----------------|------------|----------------|----------------|----------------|----------------|-----------------|-----------------|
| Denmark        | Europe     | 9.0% - 20.8%   | -0.3% - 25.8%  | 3.0% - 16.6%   | -6.7% - 13.8%  | -50.7% - -9.3%  | -34.1% - 51.0%  |
| Estonia        | Europe     | 4.3% - 11.4%   | 0.1% - 15.3%   | 4.9% - 14.9%   | -13.2% - 13.1% | -14.1% - 75.7%  | -31.6% - 143.4% |
| Finland        | Europe     | 4.7% - 19.3%   | -16.1% - 27.2% | -1.8% - 10.2%  | -25.3% - 4.6%  | -44.1% - -4.5%  | -43.9% - 99.4%  |
| France         | Europe     | -8.1% - 0.7%   | -23.4% - 11.0% | -5.3% - 10.8%  | -23.9% - 13.0% | -11.2% - 47.8%  | 3.7% - 140.7%   |
| Germany        | Europe     | 1.4% - 12.8%   | 2.1% - 36.1%   | -1.1% - 12.0%  | -16.1% - 15.8% | -14.3% - 78.0%  | -82.5% - 379.3% |
| Greece         | Europe     | -15.1% - -6.1% | -17.4% - 13.5% | -11.2% - -2.1% | -19.3% - 4.3%  | 19.7% - 57.2%   | -11.4% - 45.4%  |
| Hungary        | Europe     | -7.3% - 6.4%   | -24.0% - 4.5%  | -7.9% - 5.7%   | -30.4% - 3.7%  | -7.4% - 25.2%   | -13.7% - 56.7%  |
| Ireland        | Europe     | -1.8% - 5.7%   | 3.5% - 11.6%   | -6.7% - 9.5%   | -20.2% - 17.4% | 0.0% - 0.0%     | 0.0% - 0.0%     |
| Italy          | Europe     | -6.6% - 2.4%   | -25.4% - 6.7%  | -3.1% - 8.7%   | -13.2% - 12.0% | -9.1% - 42.4%   | -19.5% - 68.0%  |
| Latvia         | Europe     | -2.1% - 8.3%   | -2.0% - 10.1%  | 1.3% - 11.5%   | -8.8% - 5.7%   | -18.8% - 70.4%  | -32.5% - 173.4% |
| Lithuania      | Europe     | 4.8% - 12.3%   | -2.7% - 15.3%  | 4.7% - 14.1%   | -8.4% - 8.4%   | -56.5% - -16.1% | -49.5% - 84.7%  |
| Luxembourg     | Europe     | -3.0% - 16.0%  | -1.3% - 25.6%  | -6.8% - 13.4%  | -40.7% - 11.8% | -33.8% - 65.5%  | 0.0% - 265.0%   |
| Macedonia      | Europe     | -17.3% - -8.0% | -15.2% - 14.6% | -9.4% - -2.6%  | -22.4% - 4.4%  | 16.0% - 37.8%   | -4.4% - 55.8%   |
| Moldova        | Europe     | -5.8% - 6.8%   | -21.6% - 3.5%  | -3.3% - 12.9%  | -23.9% - 11.2% | -15.5% - 14.1%  | -34.1% - 41.9%  |
| Montenegro     | Europe     | -8.8% - 11.6%  | -8.0% - 33.1%  | 1.4% - 5.8%    | -14.3% - 12.8% | 35.8% - 134.6%  | -88.6% - 222.8% |
| Netherlands    | Europe     | -0.2% - 10.3%  | 4.8% - 44.9%   | -4.1% - 10.5%  | -16.1% - 22.3% | -12.8% - 68.8%  | 0.0% - 340.9%   |
| Norway         | Europe     | 3.3% - 18.1%   | -3.8% - 30.4%  | 0.7% - 9.3%    | -10.3% - 10.7% | 0.0% - 0.0%     | 0.0% - 0.0%     |
| Poland         | Europe     | 3.3% - 11.7%   | 4.2% - 26.0%   | 0.2% - 12.1%   | -8.4% - 16.1%  | -36.1% - 2.0%   | -36.3% - 36.6%  |
| Portugal       | Europe     | -8.9% - 1.6%   | -47.0% - 0.5%  | -6.5% - 3.2%   | -28.9% - 7.0%  | -2.1% - 75.5%   | -2.7% - 76.5%   |
| Romania        | Europe     | -6.7% - 3.3%   | -24.2% - 0.1%  | -6.3% - 5.0%   | -27.1% - 0.3%  | 0.8% - 26.7%    | -33.4% - 46.1%  |
| Russia         | Europe     | 1.5% - 17.1%   | -6.0% - 35.6%  | -2.6% - 9.3%   | -13.6% - 16.1% | -24.3% - 21.0%  | -65.4% - 26.1%  |
| Serbia         | Europe     | -13.9% - 0.2%  | -30.8% - -0.5% | -9.2% - 1.5%   | -26.9% - -1.7% | 12.3% - 45.7%   | -67.3% - 75.7%  |
| Slovakia       | Europe     | -0.7% - 8.3%   | -9.0% - 14.0%  | -3.8% - 7.1%   | -20.3% - 13.6% | -11.3% - 36.5%  | -10.9% - 98.4%  |
| Slovenia       | Europe     | -1.7% - 6.1%   | -10.0% - 11.8% | -3.9% - 3.1%   | -17.7% - 7.2%  | 11.8% - 77.6%   | -69.1% - 163.2% |
| Spain          | Europe     | -7.4% - 8.5%   | -18.7% - 14.3% | -3.2% - 2.3%   | -21.9% - -0.2% | -7.1% - 28.5%   | -10.3% - 61.3%  |
| Sweden         | Europe     | 2.7% - 16.4%   | -8.7% - 23.7%  | -5.0% - 6.7%   | -25.5% - 4.9%  | 0.0% - 0.0%     | 0.0% - 0.0%     |
| Switzerland    | Europe     | -4.5% - 9.0%   | 3.9% - 29.7%   | -2.7% - 6.1%   | -6.5% - 15.1%  | 15.8% - 136.1%  | 24.2% - 592.1%  |
| Ukraine        | Europe     | 0.7% - 13.1%   | -6.2% - 17.1%  | -0.6% - 16.3%  | -13.7% - 18.7% | -25.9% - 13.8%  | -35.8% - 48.9%  |
| United Kingdom | Europe     | 0.7% - 11.0%   | 2.9% - 24.0%   | -3.6% - 12.9%  | -17.7% - 18.3% | -28.2% - 16.9%  | -40.1% - 49.9%  |
| Canada         | N. America | -16.4% - -2.0% | 0.4% - 25.7%   | -8.5% - -2.7%  | -8.5% - 12.4%  | 16.7% - 57.7%   | -42.7% - 29.4%  |

|                          |            |                |                |                |                |                  |                  |
|--------------------------|------------|----------------|----------------|----------------|----------------|------------------|------------------|
| Costa Rica               | N. America | 0.4% - 7.8%    | -18.6% - 10.9% | -6.5% - 19.5%  | -18.6% - 22.2% | -23.8% - 177.2%  | -28.9% - 510.0%  |
| Cuba                     | N. America | -4.3% - 17.4%  | 0.0% - 22.0%   | -4.3% - 60.1%  | 0.0% - 64.5%   | 0.0% - 0.0%      | 0.0% - 0.0%      |
| Dominican Republic       | N. America | 3.5% - 10.6%   | -6.9% - 9.0%   | -2.8% - 26.2%  | -17.2% - 27.7% | -24.1% - 48.2%   | -51.0% - 63.2%   |
| El Salvador              | N. America | -3.2% - 5.0%   | -23.2% - 7.2%  | -4.7% - 18.8%  | -17.4% - 22.3% | -5.8% - 80.6%    | -62.7% - 127.7%  |
| Guadeloupe               | N. America | -5.2% - -1.9%  | 0.0% - 3.5%    | -1.9% - 28.7%  | 0.0% - 37.1%   | 0.0% - 0.0%      | 0.0% - 0.0%      |
| Guatemala                | N. America | -3.4% - 4.8%   | -27.6% - 2.1%  | -4.0% - 21.4%  | -13.4% - 24.3% | -0.3% - 28.2%    | -37.1% - 37.5%   |
| Haiti                    | N. America | 3.6% - 10.0%   | -9.8% - 4.9%   | -1.5% - 31.3%  | -17.8% - 29.1% | -49.2% - 105.2%  | -62.9% - 165.2%  |
| Honduras                 | N. America | -4.3% - 4.7%   | -28.4% - 3.1%  | -1.1% - 23.1%  | -15.9% - 24.1% | -29.1% - 83.7%   | -33.7% - 186.3%  |
| Mexico                   | N. America | -3.8% - 4.3%   | -34.0% - 0.1%  | -6.6% - 9.7%   | -23.6% - 8.8%  | -10.3% - 44.8%   | -35.1% - 53.8%   |
| Nicaragua                | N. America | -2.0% - 6.8%   | -29.2% - 7.2%  | -3.7% - 23.9%  | -16.8% - 26.8% | 4.0% - 118.0%    | -33.4% - 147.5%  |
| Puerto Rico              | N. America | -8.7% - -4.0%  | 0.0% - 2.4%    | -3.7% - 24.4%  | 0.0% - 34.1%   | 0.0% - 0.0%      | 0.0% - 0.0%      |
| St. Vincent & Grenadines | N. America | -4.2% - 3.0%   | -9.1% - 9.3%   | -1.8% - 20.2%  | -9.0% - 23.8%  | 0.0% - 0.0%      | 0.0% - 0.0%      |
| Trinidad and Tobago      | N. America | -6.8% - -4.0%  | -5.2% - 5.7%   | -6.1% - 29.5%  | -14.1% - 29.0% | -55.8% - 144.2%  | -18.7% - 246.6%  |
| United States            | N. America | -11.2% - 1.5%  | -21.9% - 7.5%  | -7.6% - 1.4%   | -21.6% - 5.2%  | 12.9% - 40.4%    | -48.8% - 35.6%   |
| Australia                | Oceania    | -15.7% - 1.4%  | -19.3% - 13.2% | -15.2% - -4.6% | -27.1% - 2.0%  | 12.5% - 39.5%    | -6.3% - 62.4%    |
| Fiji                     | Oceania    | -7.2% - 1.0%   | -13.1% - 10.0% | -11.8% - 10.2% | -10.9% - 16.7% | 0.0% - 0.0%      | 0.0% - 0.0%      |
| New Caledonia            | Oceania    | -5.5% - 20.5%  | -10.8% - 8.1%  | -12.9% - 85.6% | -25.2% - 78.3% | 0.0% - 0.0%      | 0.0% - 0.0%      |
| New Zealand              | Oceania    | 13.0% - 17.8%  | 14.9% - 36.9%  | 9.1% - 23.9%   | -4.8% - 23.6%  | -7.1% - 8.4%     | 0.0% - 78.5%     |
| Papua New Guinea         | Oceania    | -8.1% - -2.2%  | -22.8% - 0.6%  | -1.3% - 17.9%  | -11.6% - 18.1% | 0.0% - 0.0%      | 0.0% - 0.0%      |
| Vanuatu                  | Oceania    | -10.6% - -4.3% | -22.0% - -5.6% | -2.2% - 27.4%  | -14.7% - 42.1% | 0.0% - 0.0%      | 0.0% - 0.0%      |
| Argentina                | S. America | -2.8% - 11.0%  | -7.2% - 13.7%  | -1.6% - 1.9%   | -4.4% - 0.9%   | 10.0% - 65.8%    | -54.4% - 117.1%  |
| Belize                   | S. America | 0.9% - 5.8%    | -20.8% - -1.5% | -3.4% - 23.3%  | -15.9% - 20.6% | -41.3% - 42.4%   | -92.5% - 181.9%  |
| Bolivia                  | S. America | -5.0% - 4.9%   | -16.2% - 11.0% | 0.4% - 5.2%    | -11.4% - 7.1%  | -16.5% - 3.6%    | -59.4% - 54.1%   |
| Brazil                   | S. America | -1.6% - 5.5%   | -22.4% - 6.2%  | -4.8% - 7.5%   | -23.0% - 5.9%  | -2.1% - 70.1%    | -67.4% - 89.9%   |
| Chile                    | S. America | 6.0% - 16.9%   | 12.6% - 48.9%  | 4.8% - 12.1%   | 5.1% - 32.1%   | 8.9% - 43.7%     | -39.7% - 59.3%   |
| Colombia                 | S. America | -2.7% - 2.9%   | -23.9% - 0.3%  | -2.2% - 19.8%  | -21.0% - 20.4% | -6.7% - 43.2%    | -6.6% - 196.5%   |
| Ecuador                  | S. America | 2.7% - 8.7%    | -24.5% - 12.8% | 0.0% - 11.6%   | -11.3% - 6.9%  | -5.4% - 10.9%    | -16.2% - 25.4%   |
| French Guiana            | S. America | 2.2% - 5.9%    | -2.5% - 3.7%   | -7.6% - 28.1%  | -27.3% - 36.0% | 141.3% - 2853.0% | 116.9% - 8415.5% |
| Guyana                   | S. America | 0.7% - 7.5%    | -5.0% - 12.1%  | -4.0% - 39.6%  | -18.7% - 46.5% | 41.7% - 194.1%   | 28.9% - 813.5%   |
| Jamaica                  | S. America | -8.1% - -0.4%  | -12.4% - 0.5%  | -3.3% - 19.0%  | -13.5% - 18.4% | 0.0% - 0.0%      | 0.0% - 0.0%      |

|           |            |               |                |               |                |                 |                  |
|-----------|------------|---------------|----------------|---------------|----------------|-----------------|------------------|
| Panama    | S. America | -1.3% - 3.3%  | -20.0% - 2.5%  | -2.6% - 27.4% | -12.1% - 36.4% | -4.4% - 346.0%  | -31.3% - 855.3%  |
| Paraguay  | S. America | -8.2% - -2.8% | -33.0% - -7.5% | -11.4% - 1.7% | -44.1% - -3.9% | -10.2% - 90.1%  | -12.8% - 358.2%  |
| Peru      | S. America | 4.1% - 19.0%  | 1.8% - 44.9%   | 1.5% - 10.0%  | 0.4% - 26.9%   | -8.2% - 1.9%    | -28.5% - 1.9%    |
| Suriname  | S. America | 1.2% - 9.0%   | -4.7% - 18.3%  | -6.5% - 40.0% | -21.6% - 44.5% | 76.1% - 1289.5% | 142.4% - 4155.3% |
| Uruguay   | S. America | 0.8% - 11.8%  | 3.9% - 29.5%   | 5.8% - 13.6%  | 12.9% - 20.1%  | -19.5% - 51.4%  | 12.4% - 161.4%   |
| Venezuela | S. America | -7.7% - 2.6%  | -42.2% - -2.8% | -4.2% - 23.0% | -22.6% - 25.1% | -15.0% - 35.2%  | -13.9% - 178.4%  |
